# Supplementary material
Source: PubMed Central journal article supplement (PMC3502863)

# Supplementary Figure S1

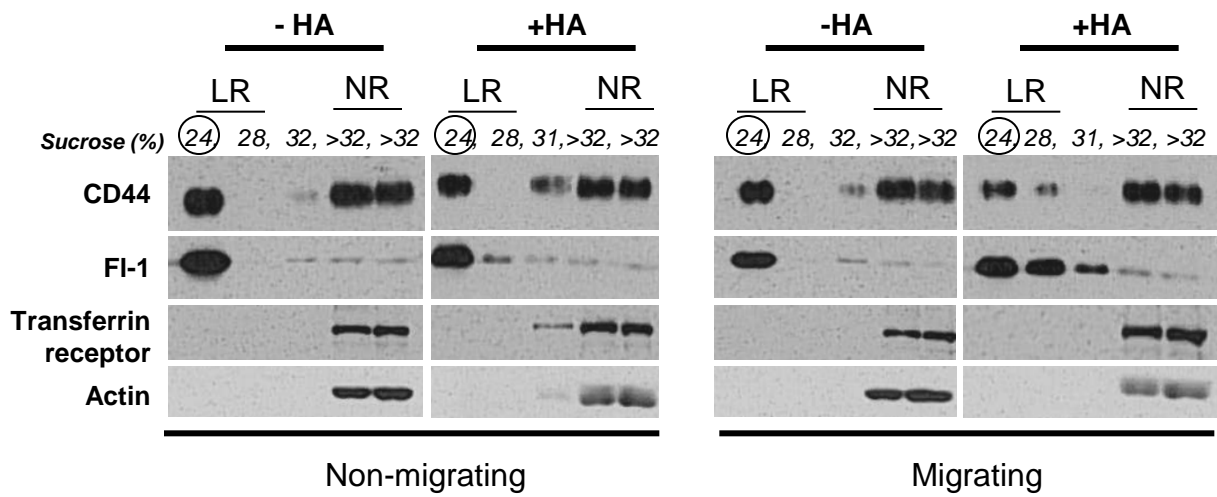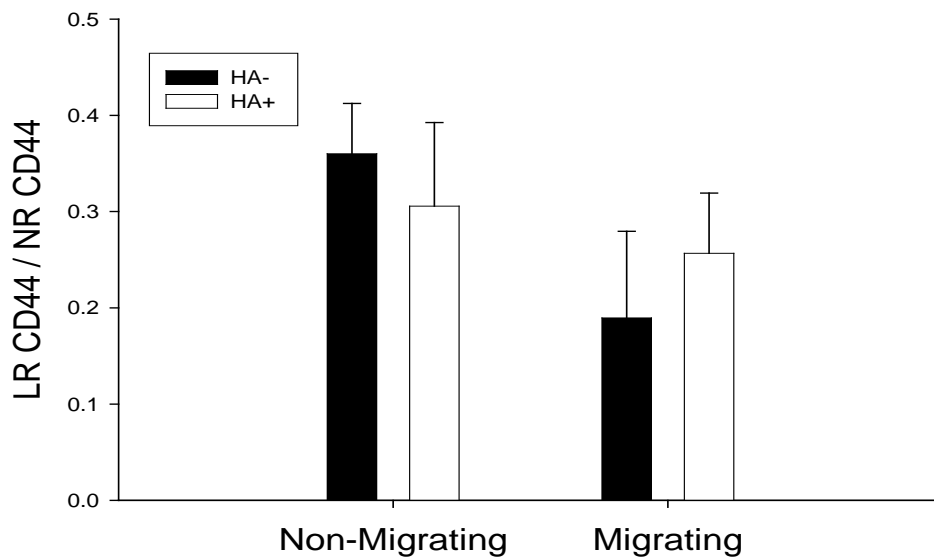

Supplement: mmc1.pdf [file mmc1.pdf]

# Supplementary Figure S2

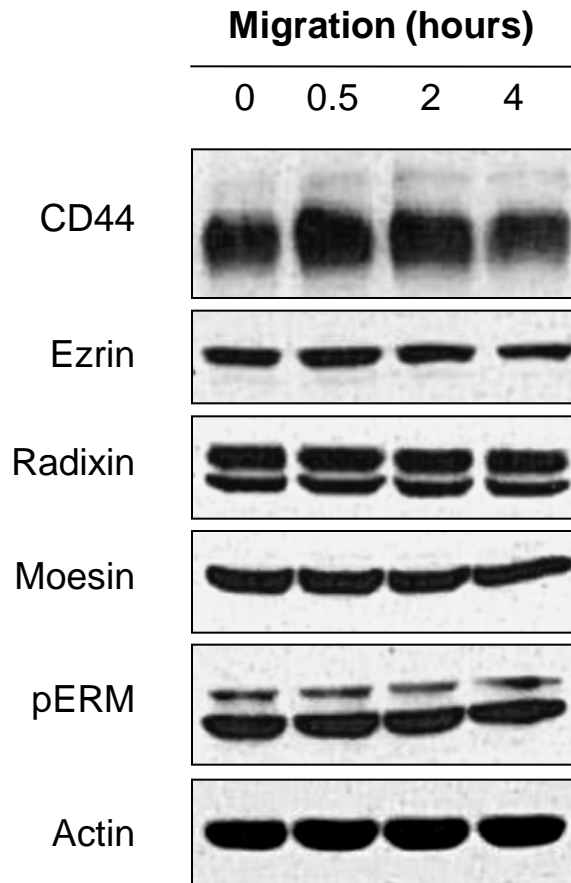

Supplement: mmc2.pdf [file mmc2.pdf]

# Supplementary Figure S3

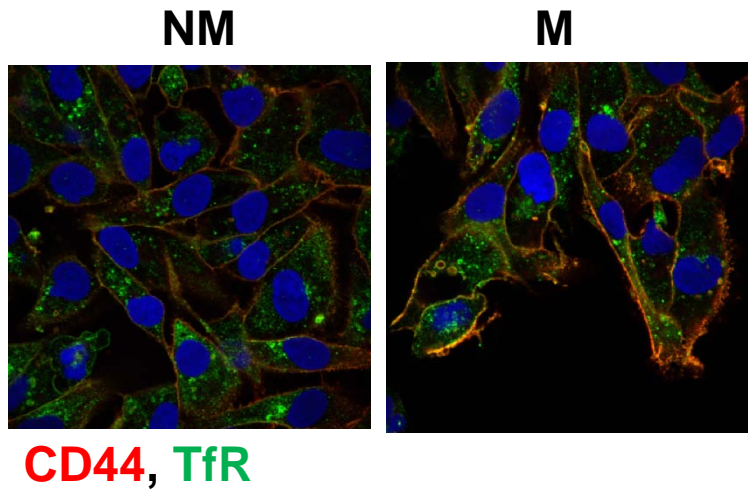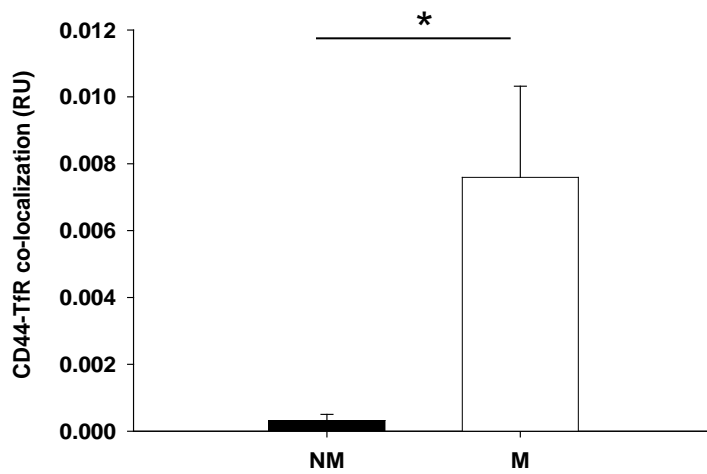

Supplement: mmc3.pdf [file mmc3.pdf]

# Supplementary Figure S4

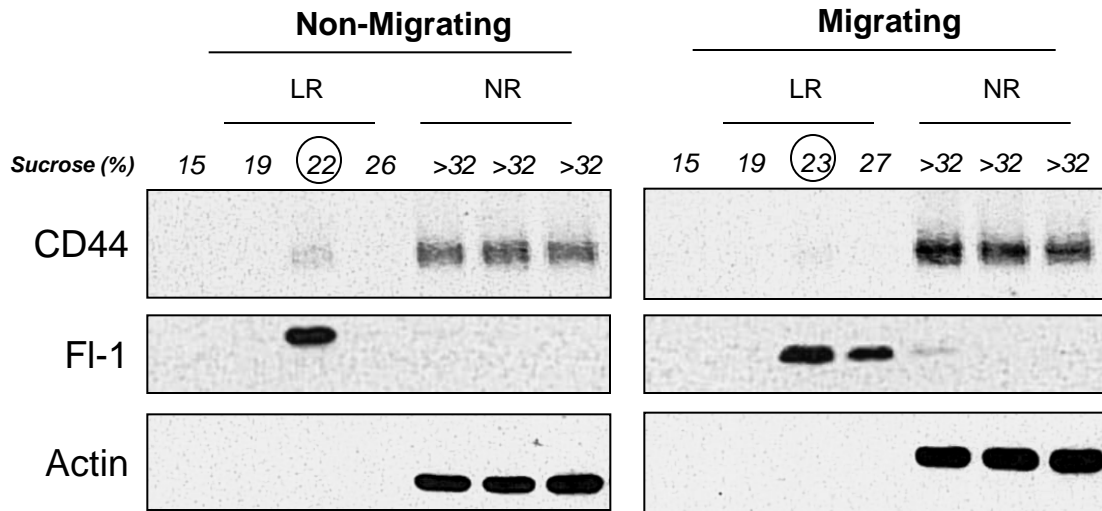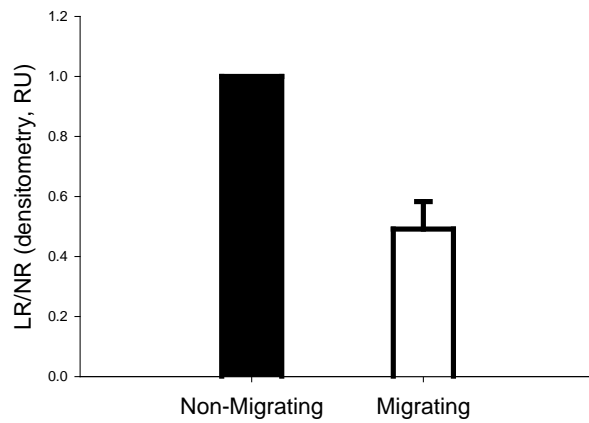

Supplement: mmc4.pdf [file mmc4.pdf]

# Supplementary Figure S5

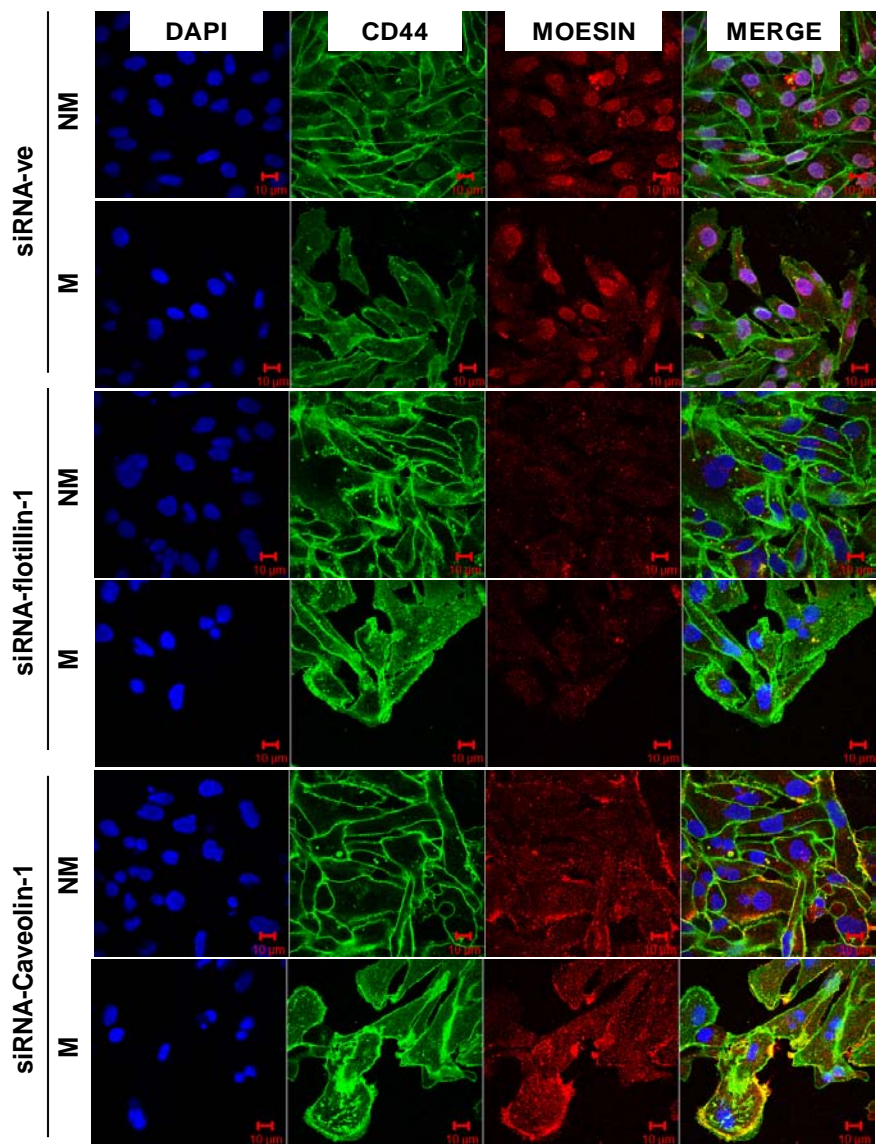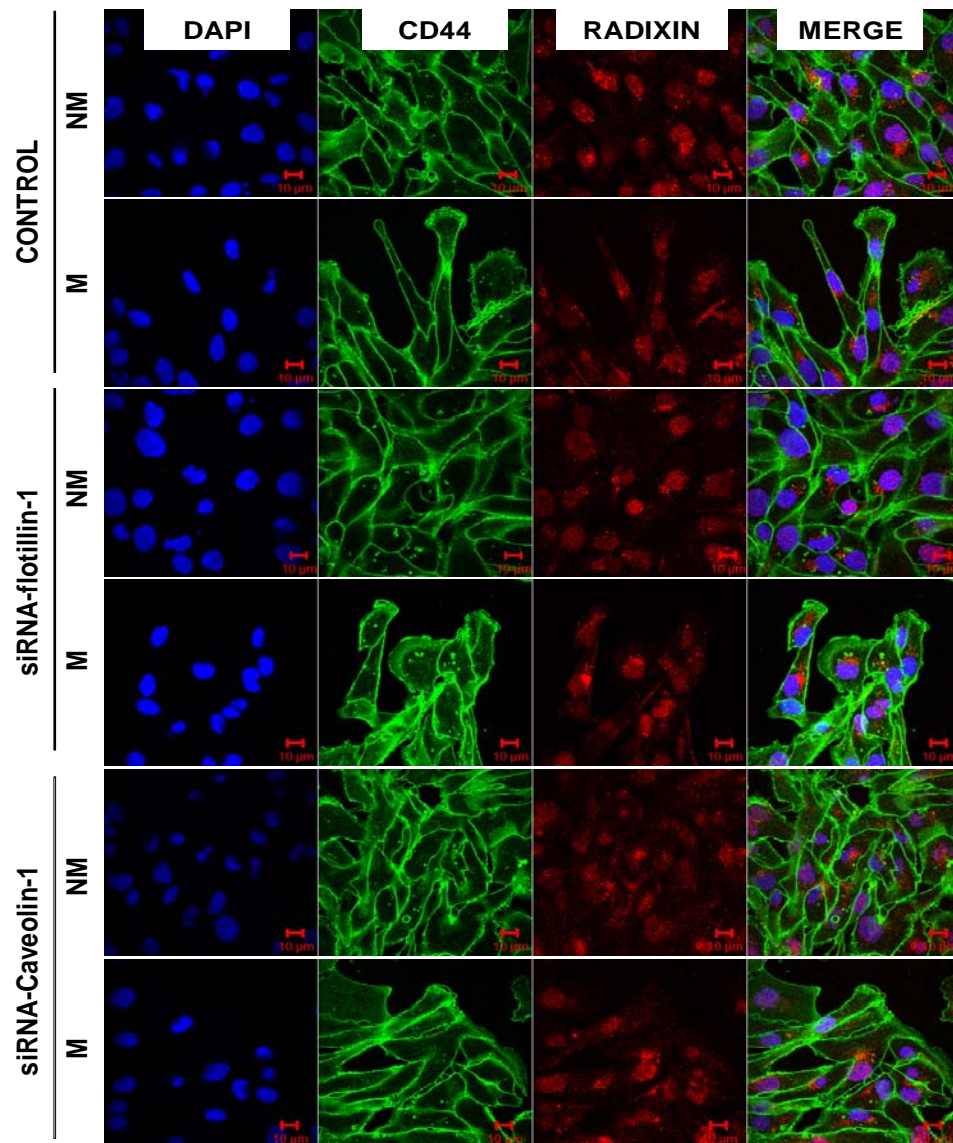

Supplement: mmc5.pdf [file mmc5.pdf]
